# Supplementary material for: Fire Regimes of Utah: The Past as Prologue
Source: MDPI journal article supplement (doi:10.3390/fire6110423), 2023-11-06
Supplement: s1 [file s1]

**Table S1.** Vegetation categories aggregated from LANDIFRE Existing Vegetation Type categories[26]. The correspondence between analyzed categories and LANDFIRE Society of American Foresters or Society for Range Management (SAF / SRM) categories and the LANDFIRE ecological systems fuel classification are below.

| Category            | SAF / SRM Category                                                                                                   |        |  |  | Fuel Classification                                                            |
|---------------------|----------------------------------------------------------------------------------------------------------------------|--------|--|--|--------------------------------------------------------------------------------|
| Agriculture         | LF 80: Agriculture                                                                                                   |        |  |  | Da Close Grown Crop                                                            |
|                     |                                                                                                                      |        |  |  | Da Row Crop                                                                    |
|                     |                                                                                                                      |        |  |  | Da Row Crop - Close Grown Crop                                                 |
|                     |                                                                                                                      |        |  |  | Da Wheat                                                                       |
|                     |                                                                                                                      |        |  |  | Dab Bush Fruit and Berries                                                     |
|                     |                                                                                                                      |        |  |  | Dab Fallow/Idle Cropland                                                       |
|                     |                                                                                                                      |        |  |  | Dab Orchard                                                                    |
|                     |                                                                                                                      |        |  |  | Dab Pasture and Hayland                                                        |
| Alpine              | SRM 410: Alpine Rangeland                                                                                            |        |  |  | He Rocky Mountain Alpine Fell-Field                                            |
|                     |                                                                                                                      |        |  |  | He Rocky Mountain Alpine Turf                                                  |
|                     |                                                                                                                      |        |  |  | He Southern Rocky Mountain Montane-Subalpine Grassland                         |
|                     |                                                                                                                      |        |  |  | Sh Rocky Mountain Alpine Dwarf-Shrubland                                       |
| Annual grassland    | LF 54: Introduced Vegetation - Herbaceous                                                                            | Upland |  |  | He Great Basin & Intermountain Introduced Annual and Biennial Forbland         |
| Aspen               | SAF 217: Aspen                                                                                                       |        |  |  | He Great Basin & Intermountain Introduced Annual Grassland                     |
|                     |                                                                                                                      |        |  |  | Tr Inter-Mountain Basins Aspen-Mixed Conifer Forest and Woodland               |
| Chaparral           | SRM 503: Arizona Chaparral                                                                                           |        |  |  | Tr Rocky Mountain Aspen Forest and Woodland                                    |
|                     |                                                                                                                      |        |  |  | Sh Great Basin Semi-Desert Chaparral                                           |
|                     |                                                                                                                      |        |  |  | Sh Mogollon Chaparral                                                          |
| Developed           | LF 20: Developed                                                                                                     |        |  |  | Sh Sonora-Mojave Semi-Desert Chaparral                                         |
|                     |                                                                                                                      |        |  |  | Bab Quarries-Strip Mines-Gravel Pits-Well and Wind Pads                        |
|                     |                                                                                                                      |        |  |  | Bau Developed-High Intensity                                                   |
|                     |                                                                                                                      |        |  |  | Bau Developed-Low Intensity                                                    |
|                     |                                                                                                                      |        |  |  | Bau Developed-Medium Intensity                                                 |
| Douglas-fir         | SAF 210: Interior Douglas-Fir<br>SAF 211: White Fir                                                                  |        |  |  | Bau Developed-Roads                                                            |
|                     |                                                                                                                      |        |  |  | Tr Middle Rocky Mountain Montane Douglas-fir Forest and Woodland               |
|                     |                                                                                                                      |        |  |  | Tr Southern Rocky Mountain Dry-Mesic Montane Mixed Conifer Forest and Woodland |
|                     |                                                                                                                      |        |  |  | Tr Southern Rocky Mountain Mesic Montane Mixed Conifer Forest and Woodland     |
| Juniper             | SRM 412: Juniper-Pinyon Woodland                                                                                     |        |  |  | Tr Great Basin Pinyon-Juniper Woodland                                         |
|                     |                                                                                                                      |        |  |  | Tr Inter-Mountain Basins Juniper Savanna                                       |
|                     | SRM 504: Juniper-Pinyon Pine Woodland                                                                                |        |  |  | Sh Colorado Plateau Pinyon-Juniper Shrubland                                   |
| Five-needle pine    | SAF 209: Bristlecone Pine<br>SAF 219: Limber Pine                                                                    |        |  |  | Tr Colorado Plateau Pinyon-Juniper Woodland                                    |
|                     |                                                                                                                      |        |  |  | Tr Inter-Mountain Basins Subalpine Limber-Bristlecone Pine Woodland            |
|                     |                                                                                                                      |        |  |  | Tr Rocky Mountain Subalpine-Montane Limber-Bristlecone Pine Woodland           |
|                     |                                                                                                                      |        |  |  | Tr Rocky Mountain Foothill Limber Pine-Juniper Woodland                        |
| Lodgepole           | SAF 218: Lodgepole Pine                                                                                              |        |  |  | Tr Rocky Mountain Lodgepole Pine Forest                                        |
|                     |                                                                                                                      |        |  |  | Tr Rocky Mountain Poor-Site Lodgepole Pine Forest                              |
| Mountain Mahogany   | SRM 415: Curlleaf Mountain-Mahogany                                                                                  |        |  |  | Tr Inter-Mountain Basins Curl-leaf Mountain Mahogany Woodland and Shrubland    |
| Perennial grassland | LF 54: Introduced Vegetation – Herbaceous                                                                            |        |  |  | Tr Southern Rocky Mountain Ponderosa Pine Savanna                              |
|                     |                                                                                                                      |        |  |  | Tr Southern Rocky Mountain Ponderosa Pine Woodland                             |
|                     | LF 59: Introduced Herbaceous Wetland and Riparian Vegetation                                                         |        |  |  | Sps Inter-Mountain Basins Sparsely Vegetated Systems                           |
|                     |                                                                                                                      |        |  |  | He Inter-Mountain Basins Alkaline Closed Depression                            |
|                     | SRM 106: Bluegrass Scabland                                                                                          |        |  |  | He North American Arid West Emergent Marsh                                     |
|                     |                                                                                                                      |        |  |  | Tr North American Warm Desert Riparian Systems                                 |
|                     | SRM 311: Rough Fescue-Bluebunch Wheatgrass                                                                           |        |  |  | He Rocky Mountain Alpine-Montane Wet Meadow                                    |
|                     |                                                                                                                      |        |  |  | Tr Inter-Mountain Basins Montane Riparian Systems                              |
|                     | SRM 312: Rough Fescue-Idaho Fescue                                                                                   |        |  |  | Tr Rocky Mountain Subalpine/Upper Montane Riparian Systems                     |
|                     |                                                                                                                      |        |  |  | Sh Western North American Ruderal Wet Shrubland Meadow & Marsh                 |
| Ponderosa Pine      | SRM 409: Tall Forb<br>SRM 502: Grama-Galetta                                                                         |        |  |  | Tr Interior West Ruderal Riparian Forest & Scrub                               |
|                     |                                                                                                                      |        |  |  | Tr Inter-Mountain Basins Montane Riparian Systems                              |
|                     |                                                                                                                      |        |  |  | Tr Rocky Mountain Montane Riparian Systems                                     |
|                     |                                                                                                                      |        |  |  | Tr North American Warm Desert Riparian Sys                                     |
| Riparian            | LF 33: Sparsely Vegetated<br>LF 56: Western Herbaceous Wetland<br>SRM 422: Riparian                                  |        |  |  |                                                                                |
|                     |                                                                                                                      |        |  |  |                                                                                |
|                     |                                                                                                                      |        |  |  |                                                                                |
|                     |                                                                                                                      |        |  |  |                                                                                |
| Riparian-hardwood   | LF 58: Introduced Woody Wetlands and Riparian Vegetation<br>SAF 235: Cottonwood-Willow<br>SRM 203: Riparian Woodland |        |  |  |                                                                                |
|                     |                                                                                                                      |        |  |  |                                                                                |
|                     |                                                                                                                      |        |  |  |                                                                                |
|                     |                                                                                                                      |        |  |  |                                                                                |

| Category     | SAF / SRM Category                          | Fuel Classification                                                                                                                                                                                                                                                                                       |
|--------------|---------------------------------------------|-----------------------------------------------------------------------------------------------------------------------------------------------------------------------------------------------------------------------------------------------------------------------------------------------------------|
| Sagebrush    | SRM 314: Big Sagebrush-Bluebunch Wheatgrass | Sh Inter-Mountain Basins Big Sagebrush Steppe<br>Sh Inter-Mountain Basins Montane Sagebrush Steppe                                                                                                                                                                                                        |
|              | SRM 402: Mountain Big Sagebrush             | Sh Inter-Mountain Basins Big Sagebrush Shrubland                                                                                                                                                                                                                                                          |
|              | SRM 403: Wyoming Big Sagebrush              | Sh Inter-Mountain Basins Semi-Desert Shrub-Steppe<br>Sh Colorado Plateau Mixed Low Sagebrush Shrubland                                                                                                                                                                                                    |
|              | SRM 405: Black Sagebrush                    | Sh Wyoming Basins Dwarf Sagebrush Shrubland and Steppe                                                                                                                                                                                                                                                    |
|              | SRM 406: Low Sagebrush                      | Sh Columbia Plateau Low Sagebrush Steppe<br>Sh Great Basin Xeric Mixed Sagebrush Shrubland                                                                                                                                                                                                                |
|              |                                             |                                                                                                                                                                                                                                                                                                           |
|              |                                             |                                                                                                                                                                                                                                                                                                           |
| Shrubland    | LF 41: Deciduous Shrubland                  | Sh Northern Rocky Mountain Subalpine Deciduous Shrubland                                                                                                                                                                                                                                                  |
|              | LF 52: Introduced Upland Vegetation – Shrub | Sh Great Basin & Intermountain Ruderal Shrubland<br>Sh Interior Western North American Temperate Ruderal Grassland & Shrubland                                                                                                                                                                            |
|              | SRM 212: Blackbush                          | Sh North American Warm Desert Ruderal & Planted Scrub & Grassland                                                                                                                                                                                                                                         |
|              | SRM 414: Salt Desert Shrub                  | Sh Colorado Plateau Blackbrush-Mormon-tea Shrubland                                                                                                                                                                                                                                                       |
|              | SRM 501: Saltbush-Greasewood                | Sh Mojave Mid-Elevation Mixed Desert Scrub                                                                                                                                                                                                                                                                |
|              | SRM 506: Creosotebush-Bursage               | Sh Inter-Mountain Basins Mixed Salt Desert Scrub                                                                                                                                                                                                                                                          |
|              | SRM 605: Sandsage Prairie                   | Sh Sonora-Mojave Mixed Salt Desert Scrub<br>Sh Inter-Mountain Basins Greasewood Flat<br>Sh Inter-Mountain Basins Mat Saltbush Shrubland<br>Sh Sonora-Mojave Creosotebush-White Bursage Desert Scrub<br>Sh Southern Colorado Plateau Sand Shrubland                                                        |
|              |                                             |                                                                                                                                                                                                                                                                                                           |
|              |                                             |                                                                                                                                                                                                                                                                                                           |
|              |                                             |                                                                                                                                                                                                                                                                                                           |
|              |                                             |                                                                                                                                                                                                                                                                                                           |
|              |                                             |                                                                                                                                                                                                                                                                                                           |
| Snow         | LF 12: Snow-Ice                             | Ba Snow-Ice                                                                                                                                                                                                                                                                                               |
| Sparse       | LF 33: Sparsely Vegetated                   | Sps Inter-Mountain Basins Sparsely Vegetated Systems<br>Sps North American Warm Desert Sparsely Vegetated Systems<br>Sps Rocky Mountain Alpine/Montane Sparsely Vegetated Systems                                                                                                                         |
|              |                                             |                                                                                                                                                                                                                                                                                                           |
|              |                                             |                                                                                                                                                                                                                                                                                                           |
| Spruce-fir   | SAF 206: Engelmann Spruce-Subalpine Fir     | Tr Rocky Mountain Subalpine Dry-Mesic Spruce-Fir Forest and Woodland<br>Tr Rocky Mountain Subalpine Mesic-Wet Spruce-Fir Forest and Woodland                                                                                                                                                              |
| Subalpine    | SAF 208: Whitebark Pine                     | Tr Northern Rocky Mountain Subalpine Woodland and Parkland                                                                                                                                                                                                                                                |
| Water        | LF 11: Water                                | Ba Open Water                                                                                                                                                                                                                                                                                             |
| WUI Shrub    | LF 20: Developed                            | Dgr Developed Herbaceous                                                                                                                                                                                                                                                                                  |
|              | SRM 421: Chokecherry-Serviceberry-Rose      | Dgr Urban Herbaceous<br>Dsh Developed Shrubland<br>Dsh Urban Shrubland<br>Sh Rocky Mountain Lower Montane-Foothill Shrubland                                                                                                                                                                              |
|              |                                             |                                                                                                                                                                                                                                                                                                           |
|              |                                             |                                                                                                                                                                                                                                                                                                           |
|              |                                             |                                                                                                                                                                                                                                                                                                           |
| WUI Woodland | LF 20: Developed                            | Dtc Developed Evergreen Forest                                                                                                                                                                                                                                                                            |
|              | SRM 413: Gambel oak                         | Dtc Urban Evergreen Forest                                                                                                                                                                                                                                                                                |
|              | SRM 418: Bigtooth Maple                     | Dtd Developed Deciduous Forest                                                                                                                                                                                                                                                                            |
|              | SRM 421: Chokecherry-Serviceberry-Rose      | Dtd Urban Deciduous Forest<br>Dtm Developed Mixed Deciduous-Evergreen Forest<br>Dtm Urban Mixed Deciduous-Evergreen Forest<br>Sh Rocky Mountain Gambel Oak-Mixed Montane Shrubland<br>Tr Rocky Mountain Bigtooth Maple Ravine Woodland<br>Sh Northern Rocky Mountain Montane-Foothill Deciduous Shrubland |
|              |                                             |                                                                                                                                                                                                                                                                                                           |
|              |                                             |                                                                                                                                                                                                                                                                                                           |
|              |                                             |                                                                                                                                                                                                                                                                                                           |
|              |                                             |                                                                                                                                                                                                                                                                                                           |

**Table S2.** Kolmogorov-Smirnov tests on the distribution of burn severity between medium-sized (40 ha ≤ area <400 ha) and large (≥400 ha) wildfires in Utah, USA from 1984 to 2022.

| Vegetation type     | D-statistic | P-value      |
|---------------------|-------------|--------------|
| Alpine              | 0.211       | <b>0.002</b> |
| Annual grassland    | 0.112       | 0.294        |
| Aspen               | 0.198       | <b>0.005</b> |
| Chaparral           | 0.145       | 0.081        |
| Douglas-fir         | 0.158       | <b>0.043</b> |
| Five-needle pine    | 0.165       | <b>0.031</b> |
| Lodgepole           | 0.211       | <b>0.002</b> |
| Mountain Mahogany   | 0.172       | <b>0.022</b> |
| Pinon - Juniper     | 0.165       | <b>0.031</b> |
| Perennial grassland | 0.178       | <b>0.015</b> |
| Ponderosa Pine      | 0.125       | 0.183        |
| Riparian            | 0.185       | <b>0.010</b> |
| Riparian-hardwood   | 0.152       | 0.059        |
| Sagebrush           | 0.185       | <b>0.010</b> |
| Shrubland           | 0.178       | <b>0.015</b> |
| Sparse              | 0.125       | 0.183        |
| Spruce-fir          | 0.185       | <b>0.010</b> |
| WUI Shrub           | 0.125       | 0.183        |
| WUI Woodland        | 0.185       | <b>0.010</b> |

**Table S3.** The number of medium-sized (40 ha ≤ area <400 ha) and large (≥400 ha) wildfires in predominantly non-forested vegetation types in Utah, USA from 1984 to 2022. Shaded cells denote the normal period from 1991 to 2020.

| Year   | Annual grassland |       | Perennial grassland |       | Sagebrush |       | Shrubland |       | Sparse |       | Chaparral |       | Riparian |       | Riparian-hardwood |       | WUI shrubland |       |
|--------|------------------|-------|---------------------|-------|-----------|-------|-----------|-------|--------|-------|-----------|-------|----------|-------|-------------------|-------|---------------|-------|
|        | Medium           | Large | Medium              | Large | Medium    | Large | Medium    | Large | Medium | Large | Medium    | Large | Medium   | Large | Medium            | Large | Medium        | Large |
| 1984   | 2                | 1     | 3                   | 1     | 3         | 1     | 0         | 0     | 0      | 0     | 0         | 1     | 0        | 0     | 1                 | 0     | 1             | 1     |
| 1985   | 7                | 11    | 8                   | 11    | 8         | 11    | 3         | 7     | 3      | 7     | 1         | 4     | 3        | 7     | 4                 | 6     | 4             | 9     |
| 1986   | 9                | 19    | 8                   | 19    | 10        | 21    | 2         | 10    | 2      | 10    | 1         | 8     | 2        | 10    | 5                 | 12    | 6             | 20    |
| 1987   | 5                | 14    | 7                   | 14    | 7         | 14    | 2         | 6     | 2      | 6     | 0         | 7     | 2        | 6     | 4                 | 6     | 5             | 13    |
| 1988   | 3                | 13    | 8                   | 14    | 7         | 14    | 0         | 8     | 0      | 8     | 1         | 4     | 0        | 8     | 1                 | 10    | 8             | 11    |
| 1989   | 5                | 13    | 5                   | 13    | 5         | 13    | 0         | 9     | 0      | 9     | 0         | 3     | 0        | 9     | 2                 | 10    | 4             | 12    |
| 1990   | 4                | 6     | 4                   | 6     | 7         | 6     | 0         | 4     | 0      | 4     | 1         | 4     | 0        | 4     | 0                 | 5     | 4             | 6     |
| 1991   | 1                | 3     | 2                   | 3     | 2         | 3     | 0         | 0     | 0      | 0     | 1         | 2     | 0        | 0     | 1                 | 1     | 2             | 3     |
| 1992   | 9                | 8     | 7                   | 8     | 10        | 8     | 2         | 4     | 2      | 4     | 6         | 6     | 2        | 4     | 1                 | 4     | 7             | 8     |
| 1993   | 13               | 7     | 10                  | 7     | 14        | 7     | 1         | 0     | 1      | 0     | 7         | 6     | 1        | 0     | 1                 | 1     | 9             | 4     |
| 1994   | 19               | 33    | 20                  | 34    | 23        | 34    | 4         | 21    | 4      | 21    | 3         | 23    | 4        | 21    | 8                 | 21    | 16            | 30    |
| 1995   | 15               | 27    | 13                  | 26    | 15        | 26    | 3         | 13    | 3      | 13    | 10        | 19    | 3        | 13    | 10                | 14    | 9             | 22    |
| 1996   | 20               | 38    | 19                  | 37    | 24        | 38    | 4         | 18    | 4      | 18    | 5         | 30    | 4        | 18    | 7                 | 22    | 11            | 36    |
| 1997   | 6                | 6     | 9                   | 7     | 12        | 7     | 4         | 3     | 4      | 3     | 4         | 4     | 4        | 3     | 4                 | 4     | 7             | 5     |
| 1998   | 6                | 16    | 5                   | 17    | 7         | 17    | 1         | 7     | 1      | 7     | 2         | 12    | 1        | 7     | 1                 | 8     | 4             | 10    |
| 1999   | 18               | 29    | 20                  | 28    | 23        | 30    | 4         | 14    | 4      | 14    | 6         | 15    | 4        | 14    | 8                 | 19    | 15            | 28    |
| 2000   | 19               | 31    | 23                  | 32    | 26        | 32    | 2         | 15    | 2      | 15    | 10        | 21    | 2        | 15    | 12                | 22    | 16            | 29    |
| 2001   | 20               | 22    | 22                  | 22    | 23        | 23    | 3         | 12    | 3      | 12    | 7         | 12    | 3        | 12    | 9                 | 14    | 15            | 18    |
| 2002   | 12               | 24    | 17                  | 25    | 18        | 26    | 5         | 18    | 5      | 18    | 5         | 5     | 5        | 18    | 5                 | 21    | 9             | 23    |
| 2003   | 17               | 14    | 21                  | 14    | 22        | 14    | 7         | 8     | 7      | 8     | 3         | 7     | 7        | 8     | 9                 | 11    | 17            | 13    |
| 2004   | 15               | 12    | 12                  | 14    | 18        | 14    | 3         | 6     | 3      | 6     | 10        | 6     | 3        | 6     | 6                 | 11    | 11            | 11    |
| 2005   | 31               | 31    | 34                  | 29    | 34        | 30    | 2         | 11    | 2      | 11    | 10        | 23    | 2        | 11    | 5                 | 15    | 23            | 27    |
| 2006   | 56               | 47    | 54                  | 46    | 58        | 47    | 9         | 19    | 9      | 19    | 13        | 28    | 9        | 19    | 17                | 26    | 34            | 42    |
| 2007   | 24               | 34    | 30                  | 34    | 36        | 35    | 6         | 24    | 6      | 24    | 7         | 18    | 6        | 24    | 7                 | 23    | 23            | 31    |
| 2008   | 23               | 6     | 26                  | 7     | 31        | 7     | 7         | 6     | 7      | 6     | 8         | 0     | 7        | 6     | 15                | 7     | 18            | 6     |
| 2009   | 14               | 15    | 17                  | 16    | 17        | 16    | 3         | 9     | 3      | 9     | 2         | 6     | 3        | 9     | 7                 | 12    | 13            | 16    |
| 2010   | 9                | 6     | 11                  | 6     | 11        | 6     | 2         | 2     | 2      | 2     | 3         | 2     | 2        | 2     | 2                 | 5     | 5             | 6     |
| 2011   | 20               | 11    | 20                  | 11    | 23        | 10    | 1         | 3     | 1      | 3     | 9         | 8     | 1        | 3     | 5                 | 3     | 12            | 9     |
| 2012   | 7                | 36    | 9                   | 37    | 10        | 37    | 2         | 22    | 2      | 22    | 3         | 22    | 2        | 22    | 3                 | 24    | 6             | 34    |
| 2013   | 13               | 11    | 15                  | 11    | 16        | 11    | 3         | 7     | 3      | 7     | 1         | 8     | 3        | 7     | 5                 | 7     | 11            | 11    |
| 2014   | 13               | 8     | 15                  | 8     | 15        | 8     | 2         | 4     | 2      | 4     | 6         | 5     | 2        | 4     | 4                 | 6     | 12            | 8     |
| 2015   | 11               | 1     | 15                  | 2     | 15        | 2     | 1         | 1     | 1      | 1     | 3         | 0     | 1        | 1     | 4                 | 1     | 8             | 2     |
| 2016   | 17               | 24    | 25                  | 24    | 25        | 24    | 4         | 18    | 4      | 18    | 8         | 6     | 4        | 18    | 9                 | 21    | 17            | 21    |
| 2017   | 37               | 23    | 34                  | 24    | 43        | 24    | 7         | 17    | 7      | 17    | 8         | 8     | 7        | 17    | 13                | 18    | 27            | 14    |
| 2018   | 25               | 18    | 29                  | 22    | 34        | 23    | 10        | 13    | 10     | 13    | 5         | 5     | 10       | 13    | 12                | 18    | 25            | 22    |
| 2019   | 16               | 21    | 17                  | 23    | 17        | 23    | 3         | 14    | 3      | 14    | 6         | 9     | 3        | 14    | 5                 | 17    | 12            | 20    |
| 2020   | 32               | 19    | 31                  | 22    | 38        | 21    | 8         | 12    | 8      | 12    | 24        | 12    | 8        | 12    | 14                | 15    | 17            | 19    |
| 2021   | 10               | 7     | 11                  | 8     | 19        | 7     | 4         | 6     | 4      | 6     | 10        | 2     | 4        | 6     | 6                 | 6     | 11            | 8     |
| 2022   | 6                | 0     | 7                   | 0     | 6         | 0     | 3         | 0     | 3      | 0     | 7         | 0     | 3        | 0     | 3                 | 0     | 5             | 0     |
| Normal | 18               | 19    | 19                  | 20    | 22        | 20    | 4         | 11    | 4      | 11    | 6         | 11    | 4        | 11    | 7                 | 13    | 14            | 18    |
| Total  | 589              | 665   | 643                 | 682   | 732       | 690   | 127       | 371   | 127    | 371   | 216       | 361   | 127      | 371   | 235               | 446   | 249           | 608   |

**Table S4.** The number of medium-sized (40 ha ≤ area <400 ha) and large (≥400 ha) wildfires in predominantly forested vegetation types in Utah, USA from 1984 to 2022. Shaded cells denote the normal period from 1991 to 2020.

| Year   | WUI<br>woodland |           | Pinon-juniper |           | Ponderosa  |           | Douglas-fir |           | Aspen      |           | Mtn.<br>Mahogany |           | Lodgepole  |           | Spruce-fir |           | Five-needle<br>pine |           | Alpine     |           |
|--------|-----------------|-----------|---------------|-----------|------------|-----------|-------------|-----------|------------|-----------|------------------|-----------|------------|-----------|------------|-----------|---------------------|-----------|------------|-----------|
|        | Mediu<br>m      | Larg<br>e | Mediu<br>m    | Larg<br>e | Mediu<br>m | Larg<br>e | Mediu<br>m  | Larg<br>e | Mediu<br>m | Larg<br>e | Mediu<br>m       | Larg<br>e | Mediu<br>m | Larg<br>e | Mediu<br>m | Larg<br>e | Mediu<br>m          | Larg<br>e | Mediu<br>m | Larg<br>e |
| 1984   | 2               | 0         | 3             | 0         | 1          | 0         | 0           | 0         | 1          | 0         | 0                | 0         | 0          | 0         | 0          | 0         | 0                   | 0         | 0          | 0         |
| 1985   | 4               | 2         | 8             | 6         | 1          | 0         | 2           | 2         | 2          | 1         | 2                | 3         | 0          | 0         | 1          | 1         | 2                   | 1         | 3          | 3         |
| 1986   | 4               | 5         | 9             | 19        | 2          | 1         | 1           | 2         | 1          | 3         | 0                | 3         | 0          | 1         | 0          | 1         | 0                   | 2         | 0          | 3         |
| 1987   | 7               | 7         | 7             | 10        | 3          | 0         | 5           | 3         | 3          | 3         | 3                | 3         | 0          | 0         | 2          | 2         | 4                   | 3         | 6          | 5         |
| 1988   | 7               | 9         | 8             | 13        | 3          | 5         | 7           | 8         | 5          | 8         | 6                | 6         | 3          | 2         | 5          | 5         | 6                   | 7         | 5          | 7         |
| 1989   | 4               | 10        | 4             | 12        | 1          | 8         | 3           | 10        | 4          | 10        | 3                | 8         | 1          | 1         | 4          | 8         | 4                   | 8         | 3          | 10        |
| 1990   | 4               | 6         | 7             | 6         | 5          | 2         | 4           | 5         | 3          | 5         | 3                | 5         | 0          | 0         | 2          | 3         | 2                   | 3         | 2          | 6         |
| 1991   | 2               | 1         | 2             | 3         | 1          | 0         | 2           | 1         | 1          | 1         | 1                | 1         | 0          | 0         | 0          | 0         | 1                   | 0         | 1          | 1         |
| 1992   | 3               | 7         | 7             | 8         | 4          | 0         | 3           | 5         | 2          | 4         | 4                | 6         | 0          | 0         | 0          | 4         | 3                   | 3         | 5          | 5         |
| 1993   | 6               | 5         | 13            | 6         | 3          | 1         | 4           | 1         | 4          | 1         | 2                | 1         | 1          | 0         | 2          | 1         | 3                   | 1         | 5          | 3         |
| 1994   | 13              | 25        | 16            | 32        | 4          | 4         | 11          | 12        | 10         | 12        | 10               | 13        | 2          | 2         | 4          | 9         | 8                   | 8         | 11         | 13        |
| 1995   | 11              | 19        | 14            | 20        | 0          | 2         | 0           | 5         | 0          | 7         | 0                | 8         | 0          | 0         | 0          | 2         | 0                   | 2         | 1          | 9         |
| 1996   | 20              | 27        | 25            | 35        | 4          | 5         | 12          | 13        | 10         | 14        | 11               | 15        | 0          | 0         | 2          | 5         | 6                   | 4         | 9          | 22        |
| 1997   | 7               | 4         | 13            | 7         | 4          | 3         | 6           | 3         | 5          | 2         | 3                | 2         | 0          | 0         | 1          | 2         | 2                   | 2         | 3          | 3         |
| 1998   | 3               | 7         | 7             | 15        | 0          | 1         | 0           | 2         | 0          | 1         | 0                | 2         | 0          | 0         | 3          | 3         | 0                   | 0         | 1          | 4         |
| 1999   | 11              | 19        | 18            | 24        | 2          | 6         | 7           | 9         | 6          | 11        | 5                | 12        | 1          | 1         | 7          | 8         | 4                   | 3         | 6          | 11        |
| 2000   | 18              | 21        | 24            | 28        | 3          | 6         | 14          | 14        | 12         | 14        | 14               | 18        | 3          | 1         | 2          | 3         | 11                  | 9         | 11         | 19        |
| 2001   | 12              | 12        | 21            | 17        | 5          | 5         | 8           | 8         | 4          | 8         | 5                | 8         | 0          | 1         | 6          | 11        | 3                   | 4         | 7          | 9         |
| 2002   | 13              | 25        | 16            | 26        | 3          | 18        | 8           | 23        | 7          | 23        | 3                | 16        | 2          | 1         | 7          | 5         | 7                   | 13        | 9          | 24        |
| 2003   | 18              | 11        | 20            | 12        | 6          | 6         | 16          | 7         | 11         | 7         | 12               | 5         | 1          | 0         | 2          | 5         | 11                  | 5         | 11         | 7         |
| 2004   | 13              | 11        | 18            | 12        | 3          | 5         | 4           | 8         | 2          | 7         | 4                | 7         | 0          | 0         | 5          | 2         | 1                   | 4         | 5          | 7         |
| 2005   | 21              | 18        | 35            | 27        | 6          | 5         | 8           | 6         | 6          | 4         | 7                | 6         | 0          | 1         | 4          | 6         | 8                   | 2         | 9          | 7         |
| 2006   | 28              | 33        | 41            | 45        | 6          | 13        | 13          | 19        | 8          | 13        | 11               | 14        | 2          | 0         | 0          | 10        | 9                   | 5         | 11         | 17        |
| 2007   | 16              | 22        | 30            | 31        | 6          | 12        | 8           | 21        | 2          | 19        | 5                | 20        | 0          | 1         | 11         | 3         | 8                   | 9         | 7          | 20        |
| 2008   | 22              | 5         | 28            | 6         | 10         | 5         | 17          | 5         | 14         | 4         | 16               | 3         | 0          | 0         | 3          | 8         | 14                  | 3         | 15         | 5         |
| 2009   | 11              | 15        | 15            | 16        | 6          | 11        | 8           | 12        | 8          | 11        | 6                | 8         | 0          | 0         | 3          | 2         | 4                   | 8         | 5          | 13        |
| 2010   | 6               | 5         | 11            | 6         | 4          | 4         | 4           | 4         | 5          | 2         | 3                | 4         | 0          | 0         | 0          | 4         | 3                   | 2         | 4          | 6         |
| 2011   | 14              | 6         | 21            | 10        | 2          | 0         | 2           | 1         | 2          | 16        | 1                | 2         | 0          | 0         | 0          | 0         | 0                   | 0         | 2          | 4         |
| 2012   | 6               | 29        | 8             | 35        | 2          | 11        | 4           | 14        | 4          | 5         | 3                | 19        | 0          | 1         | 3          | 11        | 2                   | 11        | 5          | 20        |
| 2013   | 9               | 11        | 16            | 11        | 5          | 0         | 7           | 6         | 4          | 2         | 5                | 8         | 1          | 0         | 2          | 3         | 3                   | 3         | 9          | 10        |
| 2014   | 13              | 7         | 15            | 8         | 1          | 1         | 2           | 3         | 6          | 1         | 3                | 3         | 0          | 0         | 1          | 2         | 1                   | 2         | 9          | 3         |
| 2015   | 11              | 2         | 12            | 2         | 3          | 2         | 8           | 2         | 9          | 18        | 6                | 1         | 0          | 0         | 4          | 1         | 5                   | 0         | 10         | 1         |
| 2016   | 17              | 18        | 16            | 20        | 3          | 9         | 11          | 18        | 6          | 5         | 4                | 16        | 3          | 2         | 5          | 15        | 9                   | 12        | 16         | 19        |
| 2017   | 21              | 9         | 30            | 16        | 2          | 3         | 12          | 4         | 17         | 15        | 13               | 7         | 1          | 0         | 2          | 3         | 8                   | 3         | 5          | 6         |
| 2018   | 16              | 18        | 27            | 22        | 6          | 14        | 19          | 17        | 4          | 12        | 13               | 18        | 2          | 3         | 10         | 12        | 11                  | 12        | 16         | 17        |
| 2019   | 11              | 19        | 15            | 20        | 3          | 10        | 8           | 11        | 4          | 5         | 6                | 11        | 0          | 1         | 2          | 9         | 8                   | 8         | 2          | 15        |
| 2020   | 13              | 14        | 22            | 17        | 3          | 4         | 6           | 7         | 5          | 3         | 4                | 6         | 0          | 2         | 4          | 4         | 5                   | 6         | 8          | 9         |
| 2021   | 9               | 6         | 16            | 7         | 3          | 4         | 7           | 4         | 1          | 0         | 8                | 2         | 0          | 0         | 4          | 3         | 5                   | 3         | 4          | 4         |
| 2022   | 4               | 0         | 6             | 0         | 0          | 0         | 0           | 0         | 0          | 0         | 3                | 0         | 0          | 0         | 0          | 0         | 1                   | 0         | 0          | 0         |
| Normal | 13              | 14        | 18            | 18        | 4          | 5         | 8           | 9         | 6          | 8         | 6                | 9         | 1          | 1         | 3          | 5         | 5                   | 5         | 7          | 10        |
| Total  | 430             | 470       | 624           | 610       | 129        | 186       | 261         | 295       | 198        | 277       | 208              | 290       | 23         | 21        | 113        | 176       | 182                 | 171       | 248        | 357       |

**Table S5.** The area burned in medium-sized (40 ha ≤ area <400 ha) and large (≥400 ha) wildfires in predominantly non-forested vegetation types in Utah, USA from 1984 to 2022. Shaded cells denote the normal period from 1991 to 2020.

| Year   | Annual grassland |         | Perennial grassland |         | Sagebrush  |         | Shrubland  |        | Sparse     |        | Chaparral  |           | Riparian   |           | Riparian-hardwood |           | WUI shrubland |        |
|--------|------------------|---------|---------------------|---------|------------|---------|------------|--------|------------|--------|------------|-----------|------------|-----------|-------------------|-----------|---------------|--------|
|        | Mediu<br>m       | Large   | Mediu<br>m          | Large   | Mediu<br>m | Large   | Mediu<br>m | Large  | Mediu<br>m | Large  | Mediu<br>m | Larg<br>e | Mediu<br>m | Larg<br>e | Mediu<br>m        | Larg<br>e | Mediu<br>m    | Large  |
| 1984   | 6                | 1,377   | 2                   | 382     | 45         | 1,064   | 466        | 1,127  | 3          | 3      | 0          | 1         | 0          | 0         | 1                 | 0         | 1             | 3      |
| 1985   | 19               | 3,337   | 19                  | 627     | 231        | 3,143   | 632        | 4,511  | 14         | 14     | 1          | 24        | 3          | 22        | 34                | 14        | 12            | 26     |
| 1986   | 111              | 10,301  | 52                  | 2,174   | 232        | 16,768  | 621        | 12,642 | 10         | 816    | 5          | 20        | 7          | 37        | 13                | 54        | 11            | 161    |
| 1987   | 3                | 7,815   | 52                  | 1,811   | 125        | 5,813   | 20         | 6,334  | 2          | 65     | 0          | 13        | 0          | 4         | 2                 | 8         | 4             | 57     |
| 1988   | 5                | 3,211   | 93                  | 1,216   | 421        | 10,337  | 5          | 2,628  | 5          | 100    | 0          | 5         | 0          | 35        | 1                 | 301       | 27            | 502    |
| 1989   | 12               | 686     | 30                  | 561     | 148        | 3,913   | 8          | 691    | 7          | 1,547  | 0          | 26        | 0          | 33        | 0                 | 44        | 10            | 496    |
| 1990   | 3                | 116     | 37                  | 191     | 169        | 3,162   | 3          | 123    | 37         | 352    | 3          | 11        | 0          | 3         | 0                 | 40        | 8             | 158    |
| 1991   | 31               | 23      | 47                  | 138     | 10         | 1,450   | 3          | 348    | 4          | 5      | 1          | 11        | 0          | 0         | 0                 | 0         | 1             | 97     |
| 1992   | 34               | 404     | 65                  | 664     | 510        | 4,487   | 182        | 1249   | 24         | 23     | 57         | 64        | 0          | 5         | 0                 | 25        | 12            | 97     |
| 1993   | 88               | 324     | 27                  | 215     | 440        | 3,276   | 400        | 2,067  | 16         | 70     | 16         | 113       | 0          | 0         | 0                 | 0         | 8             | 13     |
| 1994   | 107              | 15,036  | 202                 | 7,107   | 1,113      | 35,247  | 551        | 14,986 | 17         | 458    | 26         | 156       | 23         | 93        | 25                | 131       | 67            | 1,512  |
| 1995   | 216              | 9,330   | 42                  | 5,798   | 1,152      | 29,472  | 905        | 20,654 | 22         | 418    | 76         | 634       | 1          | 12        | 4                 | 58        | 49            | 213    |
| 1996   | 125              | 16,312  | 198                 | 12,432  | 1,370      | 10,2856 | 299        | 20,910 | 49         | 1,123  | 24         | 661       | 2          | 113       | 7                 | 245       | 28            | 1,532  |
| 1997   | 144              | 159     | 77                  | 133     | 615        | 1,831   | 72         | 1,102  | 13         | 107    | 18         | 94        | 1          | 9         | 3                 | 263       | 25            | 37     |
| 1998   | 84               | 14,895  | 23                  | 853     | 544        | 10,216  | 140        | 13,957 | 6          | 134    | 45         | 596       | 0          | 49        | 0                 | 72        | 4             | 108    |
| 1999   | 249              | 3,289   | 109                 | 2,484   | 1,267      | 30,364  | 727        | 6,174  | 19         | 150    | 57         | 248       | 1          | 34        | 3                 | 175       | 43            | 359    |
| 2000   | 216              | 8,698   | 269                 | 6,307   | 1,418      | 52,145  | 413        | 12,588 | 45         | 942    | 14         | 437       | 2          | 47        | 6                 | 171       | 44            | 750    |
| 2001   | 724              | 4,232   | 265                 | 5,702   | 708        | 15,849  | 453        | 6,312  | 69         | 300    | 16         | 103       | 3          | 52        | 15                | 151       | 47            | 393    |
| 2002   | 145              | 1,431   | 98                  | 3,163   | 1,008      | 25,820  | 596        | 2,382  | 83         | 3,431  | 2          | 106       | 37         | 348       | 65                | 727       | 63            | 2,692  |
| 2003   | 64               | 953     | 133                 | 1,535   | 834        | 8,666   | 50         | 9,897  | 69         | 631    | 2          | 1,745     | 5          | 331       | 9                 | 125       | 46            | 470    |
| 2004   | 112              | 1,106   | 51                  | 645     | 996        | 4,888   | 548        | 3,334  | 20         | 126    | 139        | 1,650     | 1          | 427       | 3                 | 423       | 36            | 274    |
| 2005   | 623              | 10,121  | 195                 | 2,494   | 1,201      | 23,527  | 1,986      | 45,623 | 42         | 314    | 45         | 3,000     | 0          | 133       | 4                 | 120       | 120           | 275    |
| 2006   | 699              | 8,909   | 404                 | 3,296   | 3,231      | 37,362  | 1,885      | 37,809 | 52         | 1,800  | 10         | 3,739     | 6          | 108       | 28                | 259       | 112           | 1,273  |
| 2007   | 160              | 28,783  | 222                 | 10,889  | 1,977      | 97,951  | 722        | 53,933 | 25         | 2,917  | 6          | 452       | 3          | 165       | 27                | 668       | 68            | 2,318  |
| 2008   | 118              | 49      | 187                 | 168     | 1,821      | 978     | 411        | 430    | 24         | 125    | 26         | 0         | 75         | 2         | 109               | 20        | 64            | 174    |
| 2009   | 81               | 1,632   | 68                  | 1,810   | 494        | 16,277  | 182        | 4,609  | 48         | 151    | 1          | 149       | 1          | 20        | 4                 | 86        | 46            | 462    |
| 2010   | 50               | 205     | 100                 | 853     | 505        | 4,329   | 119        | 303    | 28         | 187    | 1          | 22        | 6          | 2         | 4                 | 31        | 10            | 229    |
| 2011   | 256              | 2,860   | 90                  | 1,501   | 1,190      | 9,072   | 726        | 3,754  | 11         | 68     | 8          | 72        | 0          | 3         | 2                 | 15        | 20            | 96     |
| 2012   | 27               | 9,619   | 61                  | 10,613  | 787        | 74,309  | 81         | 20,524 | 20         | 1,515  | 2          | 1,651     | 2          | 93        | 11                | 259       | 23            | 2,974  |
| 2013   | 35               | 1,295   | 184                 | 3,480   | 1,039      | 19,228  | 106        | 1,488  | 7          | 161    | 3          | 225       | 3          | 32        | 4                 | 50        | 33            | 859    |
| 2014   | 146              | 832     | 140                 | 737     | 1,124      | 3,516   | 195        | 1,274  | 4          | 57     | 43         | 8         | 67         | 9         | 16                | 15        | 21            | 47     |
| 2015   | 111              | 4       | 670                 | 96      | 374        | 163     | 25         | 13     | 25         | 14     | 1          | 0         | 1          | 0         | 4                 | 1         | 12            | 49     |
| 2016   | 229              | 5,229   | 756                 | 14,838  | 1,243      | 5,402   | 245        | 1,770  | 49         | 251    | 16         | 54        | 5          | 100       | 6                 | 48        | 50            | 267    |
| 2017   | 679              | 12,057  | 271                 | 4,401   | 2,642      | 24,372  | 1,360      | 14,600 | 48         | 456    | 7          | 135       | 7          | 674       | 34                | 530       | 61            | 316    |
| 2018   | 329              | 1,713   | 186                 | 5,640   | 1,583      | 17,201  | 404        | 2,777  | 58         | 2,082  | 3          | 402       | 46         | 125       | 87                | 550       | 84            | 1,186  |
| 2019   | 149              | 2,420   | 104                 | 1,409   | 633        | 15,808  | 221        | 3,680  | 47         | 259    | 14         | 170       | 12         | 460       | 6                 | 246       | 20            | 237    |
| 2020   | 682              | 8,452   | 195                 | 2,747   | 1,584      | 15,168  | 1,443      | 15,934 | 86         | 5,137  | 196        | 319       | 154        | 421       | 135               | 347       | 48            | 273    |
| 2021   | 28               | 1,022   | 95                  | 519     | 513        | 5,554   | 110        | 1,579  | 40         | 499    | 55         | 3         | 5          | 446       | 51                | 98        | 21            | 512    |
| 2022   | 30               | 0       | 16                  | 0       | 229        | 0       | 127        | 0      | 39         | 0      | 21         | 0         | 14         | 0         | 8                 | 0         | 7             | 0      |
| Normal | 224              | 5,679   | 181                 | 3,738   | 1,114      | 23,041  | 515        | 10,816 | 34         | 780    | 29         | 567       | 15         | 129       | 21                | 194       | 0             | 653    |
| Total  | 6,930            | 198,237 | 5,835               | 11,9629 | 35,526     | 740,984 | 17,442     | 34,116 | 1187       | 26,808 | 960        | 17119     | 493        | 4,447     | 731               | 6,370     | 1,366         | 21,497 |

**Table S6.** The area burned in medium-sized (40 ha ≤ area <400 ha) and large (≥400 ha) wildfires in predominantly forested vegetation types in Utah, USA from 1984 to 2022. Shaded cells denote the normal period from 1991 to 2020.

|        | WUI woodland |         | Pinon-juniper |         | Ponderosa  |           | Douglas-fir |           | Aspen      |           | Mtn. Mahogany |           | Lodgepole  |           | Spruce-fir |           | Five-needle pine |           | Alpine     |           |
|--------|--------------|---------|---------------|---------|------------|-----------|-------------|-----------|------------|-----------|---------------|-----------|------------|-----------|------------|-----------|------------------|-----------|------------|-----------|
| Year   | Mediu<br>m   | Large   | Mediu<br>m    | Large   | Mediu<br>m | Larg<br>e | Mediu<br>m  | Larg<br>e | Mediu<br>m | Larg<br>e | Mediu<br>m    | Larg<br>e | Mediu<br>m | Larg<br>e | Mediu<br>m | Larg<br>e | Mediu<br>m       | Larg<br>e | Mediu<br>m | Larg<br>e |
| 1984   | 5            | 0       | 67            | 94      | 30         | 0         | 0           | 0         | 0          | 0         | 0             | 0         | 0          | 0         | 0          | 0         | 0                | 0         | 0          | 0         |
| 1985   | 50           | 24      | 290           | 359     | 11         | 0         | 22          | 18        | 10         | 0         | 18            | 22        | 0          | 0         | 1          | 0         | 4                | 0         | 0          | 30        |
| 1986   | 91           | 842     | 153           | 504     | 76         | 25        | 4           | 36        | 0          | 8         | 0             | 175       | 0          | 1         | 2          | 0         | 0                | 38        | 0          | 39        |
| 1987   | 316          | 1,260   | 504           | 2,879   | 20         | 0         | 23          | 6         | 34         | 19        | 11            | 13        | 0          | 0         | 0          | 1         | 13               | 13        | 5          | 19        |
| 1988   | 252          | 2,869   | 375           | 3,265   | 3          | 193       | 54          | 208       | 150        | 306       | 7             | 106       | 18         | 2         | 67         | 31        | 26               | 148       | 2          | 97        |
| 1989   | 212          | 1,638   | 898           | 21,241  | 13         | 721       | 156         | 1295      | 145        | 657       | 17            | 109       | 1          | 224       | 860        | 37        | 29               | 275       | 10         | 170       |
| 1990   | 83           | 2,243   | 628           | 1,259   | 7          | 10        | 35          | 590       | 53         | 135       | 17            | 46        | 0          | 0         | 10         | 13        | 13               | 25        | 0          | 89        |
| 1991   | 114          | 2       | 111           | 1,162   | 20         | 0         | 5           | 0         | 1          | 0         | 3             | 0         | 0          | 0         | 0          | 0         | 5                | 0         | 0          | 0         |
| 1992   | 196          | 1,183   | 196           | 4,776   | 1          | 0         | 20          | 47        | 3          | 244       | 54            | 105       | 0          | 0         | 8          | 0         | 17               | 278       | 20         | 208       |
| 1993   | 37           | 17      | 527           | 8,438   | 73         | 0         | 101         | 39        | 23         | 201       | 15            | 0         | 0          | 0         | 125        | 1         | 11               | 25        | 7          | 17        |
| 1994   | 413          | 3,215   | 604           | 5,898   | 10         | 918       | 127         | 585       | 137        | 954       | 23            | 714       | 30         | 39        | 59         | 49        | 68               | 438       | 11         | 406       |
| 1995   | 52           | 1,820   | 346           | 27,664  | 0          | 13        | 0           | 15        | 0          | 45        | 0             | 26        | 0          | 0         | 7          | 0         | 0                | 61        | 1          | 20        |
| 1996   | 827          | 11,650  | 519           | 5,674   | 21         | 684       | 22          | 902       | 149        | 1119      | 25            | 1033      | 0          | 0         | 183        | 99        | 74               | 285       | 5          | 331       |
| 1997   | 190          | 872     | 782           | 9,571   | 139        | 205       | 8           | 156       | 2          | 22        | 28            | 52        | 1          | 0         | 2          | 0         | 17               | 1         | 2          | 19        |
| 1998   | 6            | 74      | 929           | 10,717  | 0          | 1         | 0           | 0         | 0          | 0         | 0             | 7         | 0          | 0         | 0          | 0         | 0                | 0         | 0          | 76        |
| 1999   | 171          | 2,557   | 1,304         | 23,380  | 83         | 375       | 12          | 213       | 20         | 211       | 6             | 68        | 1          | 41        | 14         | 3         | 45               | 144       | 3          | 123       |
| 2000   | 829          | 5,306   | 519           | 14,546  | 13         | 26        | 146         | 713       | 155        | 420       | 72            | 872       | 17         | 3         | 35         | 35        | 92               | 88        | 23         | 379       |
| 2001   | 607          | 4,609   | 688           | 1,304   | 68         | 515       | 70          | 1014      | 13         | 932       | 27            | 374       | 0          | 28        | 102        | 1         | 14               | 290       | 4          | 100       |
| 2002   | 47           | 12,415  | 787           | 6,524   | 1          | 2,608     | 122         | 8909      | 123        | 5709      | 2             | 1100      | 4          | 692       | 3248       | 130       | 93               | 4530      | 17         | 2072      |
| 2003   | 824          | 7,605   | 189           | 3,391   | 13         | 621       | 108         | 813       | 197        | 546       | 27            | 92        | 70         | 0         | 108        | 105       | 61               | 414       | 14         | 185       |
| 2004   | 106          | 9,317   | 223           | 643     | 48         | 212       | 67          | 664       | 7          | 605       | 2             | 117       | 0          | 0         | 77         | 0         | 0                | 53        | 3          | 164       |
| 2005   | 149          | 1,095   | 214           | 12,886  | 255        | 61        | 113         | 186       | 139        | 463       | 27            | 104       | 0          | 626       | 73         | 228       | 71               | 182       | 11         | 61        |
| 2006   | 698          | 5,309   | 406           | 2,376   | 15         | 550       | 141         | 515       | 151        | 103       | 27            | 350       | 12         | 0         | 32         | 47        | 67               | 84        | 18         | 163       |
| 2007   | 373          | 12,139  | 171           | 586     | 311        | 1,163     | 74          | 1258      | 3          | 2480      | 2             | 1026      | 0          | 750       | 1031       | 0         | 31               | 590       | 3          | 1150      |
| 2008   | 412          | 867     | 139           | 265     | 251        | 1,417     | 514         | 870       | 277        | 128       | 89            | 4         | 0          | 0         | 26         | 45        | 126              | 10        | 39         | 51        |
| 2009   | 321          | 4,026   | 150           | 1,900   | 243        | 1,761     | 149         | 1618      | 206        | 668       | 2             | 582       | 0          | 0         | 173        | 44        | 20               | 297       | 7          | 339       |
| 2010   | 196          | 2,125   | 856           | 4,670   | 196        | 451       | 108         | 3789      | 40         | 1496      | 6             | 944       | 0          | 0         | 849        | 2         | 17               | 1695      | 5          | 362       |
| 2011   | 84           | 24      | 660           | 27,902  | 44         | 0         | 5           | 0         | 0          | 0         | 1             | 61        | 0          | 0         | 0          | 0         | 0                | 0         | 1          | 10        |
| 2012   | 70           | 12,815  | 296           | 3,350   | 0          | 802       | 34          | 3965      | 15         | 5137      | 27            | 1776      | 0          | 13        | 1187       | 23        | 9                | 1335      | 7          | 1614      |
| 2013   | 63           | 1,153   | 487           | 7,566   | 258        | 0         | 82          | 502       | 38         | 170       | 2             | 474       | 5          | 0         | 39         | 13        | 8                | 439       | 125        | 1627      |
| 2014   | 316          | 707     | 67            | 94      | 1          | 2         | 7           | 35        | 32         | 7         | 2             | 9         | 0          | 0         | 2          | 10        | 2                | 28        | 38         | 150       |
| 2015   | 290          | 177     | 290           | 359     | 29         | 724       | 22          | 118       | 51         | 7         | 9             | 43        | 0          | 0         | 4          | 4         | 16               | 0         | 84         | 3         |
| 2016   | 60           | 1,433   | 153           | 504     | 41         | 128       | 37          | 892       | 180        | 1818      | 16            | 156       | 31         | 211       | 1338       | 43        | 12               | 372       | 265        | 1244      |
| 2017   | 431          | 882     | 504           | 2,879   | 106        | 2,128     | 59          | 7538      | 15         | 10196     | 31            | 767       | 1          | 0         | 4280       | 2         | 56               | 1717      | 12         | 228       |
| 2018   | 423          | 21,437  | 375           | 3,265   | 84         | 1,556     | 230         | 17368     | 295        | 17962     | 28            | 2026      | 16         | 862       | 8080       | 341       | 105              | 2960      | 23         | 740       |
| 2019   | 663          | 1,275   | 898           | 21,241  | 87         | 1,692     | 140         | 2266      | 12         | 2069      | 10            | 195       | 0          | 96        | 1605       | 1         | 38               | 505       | 3          | 69        |
| 2020   | 489          | 2,078   | 628           | 1,259   | 26         | 416       | 16          | 2443      | 66         | 4235      | 8             | 209       | 0          | 5998      | 19834      | 54        | 67               | 2188      | 41         | 560       |
| 2021   | 437          | 1,074   | 111           | 1,162   | 186        | 437       | 179         | 1431      | 73         | 2017      | 108           | 40        | 0          | 0         | 1216       | 15        | 64               | 57        | 4          | 50        |
| 2022   | 43           | 0       | 196           | 4,776   | 0          | 0         | 0           | 0         | 0          | 0         | 1             | 0         | 0          | 0         | 0          | 0         | 2                | 0         | 0          | 0         |
| Normal | 315          | 4,273   | 467           | 7,160   | 81         | 634       | 85          | 1914      | 78         | 1931      | 19            | 443       | 6          | 312       | 1417       | 43        | 38               | 634       | 26         | 416       |
| Total  | 10,946       | 138,134 | 17,240        | 250,329 | 2783       | 20,415    | 3012        | 61,017    | 2,815      | 61,089    | 750           | 13,797    | 207        | 9,586     | 44,677     | 1,377     | 1,296            | 19,565    | 813        | 12,965    |

**Table S7.** The median differenced Normalized Burn Ratio (dNBR) in medium-sized (40 ha ≤ area <400 ha) and large (≥400 ha) wildfires in predominantly non-forested vegetation types in Utah, USA from 1984 to 2022. Shaded cells denote the normal period from 1991 to 2020.

|        |  | Annual<br>grassland |       | Perennial<br>grassland |       | Sagebrush |       | Shrubland |       | Sparse |       | Chaparral |       | Riparian |       | Riparian-<br>hardwood |       | WUI shrubland |       |
|--------|--|---------------------|-------|------------------------|-------|-----------|-------|-----------|-------|--------|-------|-----------|-------|----------|-------|-----------------------|-------|---------------|-------|
| Year   |  | Medium              | Large | Medium                 | Large | Medium    | Large | Medium    | Large | Medium | Large | Medium    | Large | Medium   | Large | Medium                | Large | Medium        | Large |
| 1984   |  | 161                 | 232   | 157                    | 207   | 105       | 182   | 141       | 182   | 15     | -2    | -         | 137   | -        | -     | 16                    | -     | 85            | 230   |
| 1985   |  | 162                 | 136   | 153                    | 139   | 195       | 118   | 114       | 131   | 199    | 42    | 265       | 69    | 285      | 82    | 245                   | 79    | 178           | 128   |
| 1986   |  | 72                  | 122   | 468                    | 154   | 57        | 130   | 54        | 88    | 49     | 95    | 347       | 57    | 352      | 213   | 265                   | 265   | 61            | 93    |
| 1987   |  | 284                 | 202   | 394                    | 174   | 274       | 148   | 191       | 185   | 44     | 194   | -         | 82    | 71       | 244   | 260                   | 191   | 191           | 95    |
| 1988   |  | 310                 | 157   | 236                    | 197   | 174       | 158   | 9         | 156   | 145    | 108   | 44        | -7    | -        | 161   | 7                     | 165   | 126           | 134   |
| 1989   |  | 216                 | 130   | 386                    | 319   | 190       | 214   | 144       | 114   | 221    | 132   | -         | 47    | -        | 31    | 293                   | 294   | 219           | 236   |
| 1990   |  | 144                 | 54    | 164                    | 144   | 212       | 85    | 59        | 72    | 10     | 113   | 400       | 58    | -        | 108   | -                     | 156   | 40            | 51    |
| 1991   |  | 171                 | 47    | 163                    | 64    | 18        | 45    | 19        | 42    | 69     | 6     | -28       | -62   | -        | -     | 33                    | -10   | 88            | 59    |
| 1992   |  | 153                 | 56    | 129                    | 152   | 165       | 81    | 128       | 85    | 104    | -11   | 193       | 288   | 86       | 58    | 46                    | 97    | 74            | 18    |
| 1993   |  | 138                 | 138   | 173                    | 115   | 154       | 284   | 107       | 141   | 101    | 138   | 131       | 178   | 311      | -     | 349                   | 16    | 131           | 404   |
| 1994   |  | 124                 | 158   | 259                    | 204   | 207       | 159   | 128       | 143   | 353    | 158   | 154       | 133   | 209      | 165   | 376                   | 188   | 215           | 258   |
| 1995   |  | 167                 | 201   | 231                    | 214   | 209       | 148   | 161       | 152   | 47     | 44    | 267       | 117   | 135      | 87    | 153                   | 76    | 159           | 143   |
| 1996   |  | 222                 | 218   | 198                    | 193   | 150       | 180   | 120       | 163   | 138    | 108   | 229       | 183   | -6       | 241   | 166                   | 236   | 185           | 173   |
| 1997   |  | 132                 | 115   | 109                    | 205   | 127       | 153   | 120       | 146   | 121    | 187   | 117       | 124   | 265      | 259   | 164                   | 249   | 103           | 133   |
| 1998   |  | 67                  | 88    | 112                    | 133   | 151       | 117   | 159       | 85    | 130    | 44    | 346       | 90    | -100     | 74    | 20                    | 75    | 128           | 40    |
| 1999   |  | 129                 | 149   | 131                    | 193   | 132       | 205   | 141       | 145   | 71     | 87    | 148       | 150   | 503      | 222   | 266                   | 188   | 43            | 176   |
| 2000   |  | 135                 | 108   | 161                    | 132   | 215       | 155   | 142       | 114   | 105    | 66    | 219       | 164   | 84       | 89    | 143                   | 114   | 221           | 137   |
| 2001   |  | 181                 | 204   | 192                    | 237   | 165       | 185   | 181       | 135   | 112    | 81    | 230       | 104   | 158      | 188   | 326                   | 181   | 194           | 127   |
| 2002   |  | 164                 | 251   | 281                    | 295   | 230       | 292   | 168       | 169   | 45     | 138   | 209       | 97    | 402      | -21   | 468                   | 179   | 169           | 228   |
| 2003   |  | 279                 | 174   | 330                    | 226   | 316       | 229   | 147       | 227   | 128    | 93    | 78        | 276   | -13      | 453   | 245                   | 129   | 272           | 306   |
| 2004   |  | 189                 | 108   | 153                    | 94    | 207       | 118   | 199       | 66    | 94     | 43    | 273       | 120   | 220      | 353   | 145                   | 145   | 240           | 155   |
| 2005   |  | 204                 | 68    | 193                    | 111   | 181       | 91    | 115       | 139   | 68     | 46    | 143       | 173   | 189      | 70    | 388                   | 111   | 134           | 54    |
| 2006   |  | 160                 | 194   | 208                    | 197   | 170       | 147   | 95        | 81    | 53     | 88    | 180       | 140   | 116      | 189   | 180                   | 109   | 159           | 186   |
| 2007   |  | 189                 | 121   | 200                    | 143   | 172       | 158   | 125       | 90    | 96     | 56    | 124       | 188   | 235      | 106   | 195                   | 103   | 137           | 159   |
| 2008   |  | 192                 | 153   | 189                    | 217   | 204       | 225   | 177       | 128   | 192    | 35    | 265       | -     | 235      | 217   | 215                   | 220   | 178           | 227   |
| 2009   |  | 264                 | 172   | 240                    | 197   | 212       | 253   | 159       | 156   | 55     | 83    | 183       | 224   | 89       | 211   | 101                   | 325   | 241           | 225   |
| 2010   |  | 75                  | 241   | 82                     | 342   | 194       | 376   | 112       | 208   | 79     | -77   | 341       | 142   | 169      | 385   | 74                    | 176   | 258           | 349   |
| 2011   |  | 143                 | 165   | 136                    | 152   | 155       | 140   | 93        | 134   | 91     | 28    | 90        | 99    | 90       | 109   | 199                   | 60    | 142           | 110   |
| 2012   |  | 210                 | 75    | 267                    | 142   | 191       | 94    | 189       | 70    | 11     | 30    | 290       | 85    | 235      | 216   | 244                   | 184   | 211           | 159   |
| 2013   |  | 236                 | 128   | 247                    | 246   | 142       | 169   | 161       | 132   | 131    | 37    | 167       | 28    | 292      | 372   | 271                   | 60    | 284           | 192   |
| 2014   |  | 225                 | 235   | 221                    | 435   | 171       | 186   | 157       | 154   | 33     | 74    | 146       | 180   | 257      | 715   | 225                   | 237   | 175           | 139   |
| 2015   |  | 265                 | 619   | 384                    | 617   | 129       | 14    | 124       | -6    | 213    | -40   | 65        | -     | 85       | 487   | 90                    | 257   | 81            | 16    |
| 2016   |  | 170                 | 195   | 318                    | 306   | 142       | 89    | 120       | 96    | 23     | 83    | 145       | 77    | 398      | 350   | 33                    | 133   | 115           | 63    |
| 2017   |  | 135                 | 162   | 200                    | 133   | 171       | 127   | 115       | 138   | 100    | 2     | 174       | 40    | 181      | 114   | 262                   | 224   | 219           | 93    |
| 2018   |  | 169                 | 156   | 173                    | 189   | 176       | 131   | 139       | 93    | 80     | 22    | 96        | 199   | 362      | 152   | 121                   | 160   | 203           | 80    |
| 2019   |  | 208                 | 242   | 148                    | 200   | 162       | 193   | 119       | 155   | 135    | 21    | 138       | 191   | 321      | 160   | 157                   | 137   | 160           | 147   |
| 2020   |  | 138                 | 152   | 150                    | 130   | 150       | 129   | 141       | 149   | 81     | 12    | 194       | 252   | 70       | -5    | 123                   | 167   | 187           | 126   |
| 2021   |  | 56                  | 94    | 102                    | 91    | 60        | 43    | 43        | 70    | 45     | 18    | 51        | 41    | 61       | 341   | 44                    | 61    | 9             | 55    |
| 2022   |  | 105                 | -     | 119                    | -     | 82        | -     | 92        | -     | 71     | -     | 133       | -     | 116      | -     | 129                   | -     | 113           | -     |
| Normal |  | 174                 | 169   | 199                    | 207   | 172       | 162   | 135       | 124   | 101    | 56    | 176       | 142   | 192      | 214   | 192                   | 150   | 170           | 156   |



**Table S8.** The median differenced Normalized Burn Ratio (dNBR) in medium-sized (40 ha ≤ area <400 ha) and large (≥400 ha) wildfires in predominantly forested vegetation types in Utah, USA from 1984 to 2022. Shaded cells denote the normal period from 1991 to 2020.

| Year   | WUI<br>woodland |           | Pinon-juniper |           | Ponderosa  |           | Douglas-fir |           | Aspen      |           | Mtn.<br>Mahogany |           | Lodgepole  |           | Spruce-fir |           | Five-needle<br>pine |           | Alpine     |           |
|--------|-----------------|-----------|---------------|-----------|------------|-----------|-------------|-----------|------------|-----------|------------------|-----------|------------|-----------|------------|-----------|---------------------|-----------|------------|-----------|
|        | Mediu<br>m      | Larg<br>e | Mediu<br>m    | Larg<br>e | Mediu<br>m | Larg<br>e | Mediu<br>m  | Larg<br>e | Mediu<br>m | Larg<br>e | Mediu<br>m       | Larg<br>e | Mediu<br>m | Larg<br>e | Mediu<br>m | Larg<br>e | Mediu<br>m          | Larg<br>e | Mediu<br>m | Larg<br>e |
| 1984   | 186             | -         | 234           | -         | 196        | -         | -           | -         | 374        | -         | -                | -         | -          | -         | -          | -         | -                   | -         | -          | -         |
| 1985   | 49              | 416       | 45            | 103       | 11         | -         | 14          | 109       | 18         | 644       | 5                | 159       | -          | -         | 15         | 109       | 19                  | 59        | 252        | 171       |
| 1986   | 281             | 274       | 176           | 230       | 213        | 228       | 162         | 140       | 389        | 210       | -                | 406       | -          | -138      | -          | 25        | -                   | -72       | -          | 156       |
| 1987   | 217             | 233       | 133           | 44        | 61         | -         | 27          | 78        | 185        | 87        | 184              | 244       | -          | -         | 153        | 61        | 207                 | 203       | 363        | 218       |
| 1988   | 299             | 247       | 106           | 96        | 212        | 124       | 171         | 183       | 211        | 338       | 260              | 164       | 187        | 260       | 49         | 312       | 175                 | 140       | 112        | 222       |
| 1989   | 352             | 406       | 197           | 251       | 352        | 248       | 444         | 336       | 379        | 342       | 287              | 263       | -13        | 16        | 58         | 47        | 305                 | 343       | 208        | 313       |
| 1990   | 115             | 174       | 104           | 155       | 19         | 211       | 60          | 381       | 210        | 341       | 595              | 159       | -          | -         | 266        | 373       | 334                 | 61        | 452        | 61        |
| 1991   | 133             | 63        | 316           | -64       | 458        | -         | 151         | -166      | 41         | 110       | 79               | 110       | -          | -         | -          | -         | 21                  | -         | -6         | -88       |
| 1992   | 295             | 126       | 129           | 65        | 65         | -         | 206         | 65        | 311        | 300       | 217              | 149       | -          | -         | -          | 372       | 177                 | 9         | 167        | 294       |
| 1993   | 478             | 502       | 301           | 283       | 204        | 27        | 271         | 153       | 277        | 196       | 234              | 106       | 58         | -         | 657        | 85        | 302                 | 216       | 206        | 269       |
| 1994   | 208             | 223       | 177           | 53        | 392        | 110       | 274         | 349       | 307        | 281       | 128              | 287       | 413        | 199       | 578        | 415       | 222                 | 109       | 295        | 282       |
| 1995   | 181             | 126       | 145           | 8         | -          | 360       | -           | -37       | -          | 14        | -                | -20       | -          | -         | -          | -58       | -                   | -158      | 100        | 266       |
| 1996   | 200             | 235       | 160           | 78        | 269        | 280       | 157         | 218       | 184        | 277       | 161              | 336       | -          | -         | 184        | 162       | 224                 | 235       | 179        | 256       |
| 1997   | 177             | 180       | 145           | 120       | 200        | 123       | 132         | 168       | 65         | 153       | 125              | 317       | 174        | -         | 228        | 418       | 263                 | 266       | 200        | 259       |
| 1998   | 304             | 264       | 313           | 19        | -          | -11       | -           | -41       | -          | 278       | -                | 113       | -          | -         | -          | -         | -                   | -         | 356        | 142       |
| 1999   | 133             | 245       | 95            | 47        | 75         | 5         | 63          | 49        | 276        | 53        | 88               | 146       | 262        | -2        | 136        | -69       | -2                  | 312       | 244        | 203       |
| 2000   | 309             | 263       | 192           | 95        | 169        | 532       | 211         | 339       | 125        | 336       | 300              | 205       | 28         | 336       | 48         | 192       | 158                 | 133       | 219        | 327       |
| 2001   | 369             | 290       | 235           | 118       | 276        | 157       | 228         | 158       | 97         | 194       | 168              | 275       | -          | 349       | 93         | 343       | 206                 | 310       | 202        | 272       |
| 2002   | 204             | 273       | 145           | 194       | 49         | 138       | 132         | 305       | 225        | 310       | 295              | 272       | 100        | 151       | 84         | 155       | 128                 | 225       | 215        | 274       |
| 2003   | 305             | 229       | 222           | 214       | 148        | 151       | 173         | 235       | 252        | 330       | 225              | 340       | 107        | -         | 197        | 207       | 141                 | 229       | 342        | 338       |
| 2004   | 282             | 113       | 190           | 110       | 69         | 188       | 129         | 350       | 196        | 272       | 200              | 143       | -          | -         | 69         | 178       | 109                 | 177       | 335        | 144       |
| 2005   | 220             | 211       | 112           | 99        | 111        | 459       | 213         | 280       | 229        | 287       | 266              | 347       | -          | 81        | 167        | 161       | 363                 | 373       | 302        | 131       |
| 2006   | 269             | 272       | 113           | 152       | 225        | 220       | 293         | 220       | 241        | 253       | 199              | 217       | 202        | -         | 225        | 171       | 278                 | 321       | 319        | 36        |
| 2007   | 195             | 307       | 129           | 87        | 166        | 171       | 92          | 212       | 52         | 168       | 197              | 307       | -          | 163       | -          | 146       | 99                  | 144       | 116        | 240       |
| 2008   | 268             | 313       | 192           | 230       | 113        | 147       | 171         | 103       | 108        | 225       | 178              | 198       | -          | -         | 129        | 99        | 163                 | 108       | 288        | 311       |
| 2009   | 379             | 378       | 226           | 251       | 128        | 165       | 284         | 242       | 213        | 298       | 253              | 340       | -          | -         | 335        | 423       | 532                 | 257       | 252        | 344       |
| 2010   | 388             | 352       | 174           | 279       | 141        | 298       | 81          | 210       | 25         | 139       | 179              | 326       | -          | -         | 69         | 50        | 93                  | 301       | 279        | 481       |
| 2011   | 200             | 39        | 141           | -31       | 99         | -         | 67          | -112      | -          | -         | 2                | -56       | -          | -         | -          | -         | -                   | -         | 297        | 186       |
| 2012   | 400             | 236       | 83            | 78        | 31         | 152       | 170         | 430       | 103        | 238       | 227              | 139       | -          | 195       | 351        | 492       | 276                 | 274       | 243        | 285       |
| 2013   | 265             | 164       | 140           | 17        | 126        | -         | 187         | 43        | 172        | 124       | 192              | 12        | 347        | -         | 234        | 80        | 162                 | 104       | 336        | 279       |
| 2014   | 148             | 581       | 38            | 34        | 129        | 144       | 13          | 237       | 115        | 338       | 77               | 172       | -          | -         | 95         | 185       | 220                 | 256       | 369        | 351       |
| 2015   | 221             | 416       | 108           | 25        | 136        | 27        | 101         | 82        | 135        | 205       | 88               | 17        | -          | -         | 81         | 181       | 131                 | -         | 342        | 303       |
| 2016   | 154             | 120       | 66            | 45        | 102        | 65        | 65          | 54        | 83         | -2        | 40               | 41        | 120        | 11        | 67         | 17        | 136                 | 11        | 301        | 311       |
| 2017   | 319             | 224       | 244           | 60        | 201        | 199       | 389         | 401       | 427        | 380       | 344              | 164       | 481        | -         | 500        | 477       | 175                 | 133       | 345        | 89        |
| 2018   | 357             | 320       | 213           | 206       | 186        | 255       | 230         | 467       | 173        | 419       | 361              | 344       | 90         | 249       | 310        | 574       | 156                 | 193       | 259        | 195       |
| 2019   | 196             | 264       | 134           | 170       | 275        | 107       | 197         | 257       | 213        | 246       | 301              | 163       | -          | 68        | 119        | 450       | 106                 | 178       | -24        | 249       |
| 2020   | 225             | 311       | 169           | 190       | 202        | 313       | 152         | 385       | 120        | 330       | 257              | 218       | -          | 265       | 199        | 254       | 158                 | 146       | 228        | 38        |
| 2021   | 133             | 74        | 148           | 47        | 117        | 70        | 164         | 91        | 139        | 48        | 193              | 82        | -          | -         | 220        | 40        | 99                  | 31        | 42         | 65        |
| 2022   | 159             | -         | 103           | -         | -          | -         | -           | -         | -          | -         | 98               | -         | -          | -         | -          | -         | 184                 | -         | -          | -         |
| Normal | 259             | 254       | 168           | 107       | 169        | 183       | 172         | 188       | 176        | 232       | 192              | 190       | 198        | 172       | 214        | 228       | 185                 | 187       | 243        | 235       |

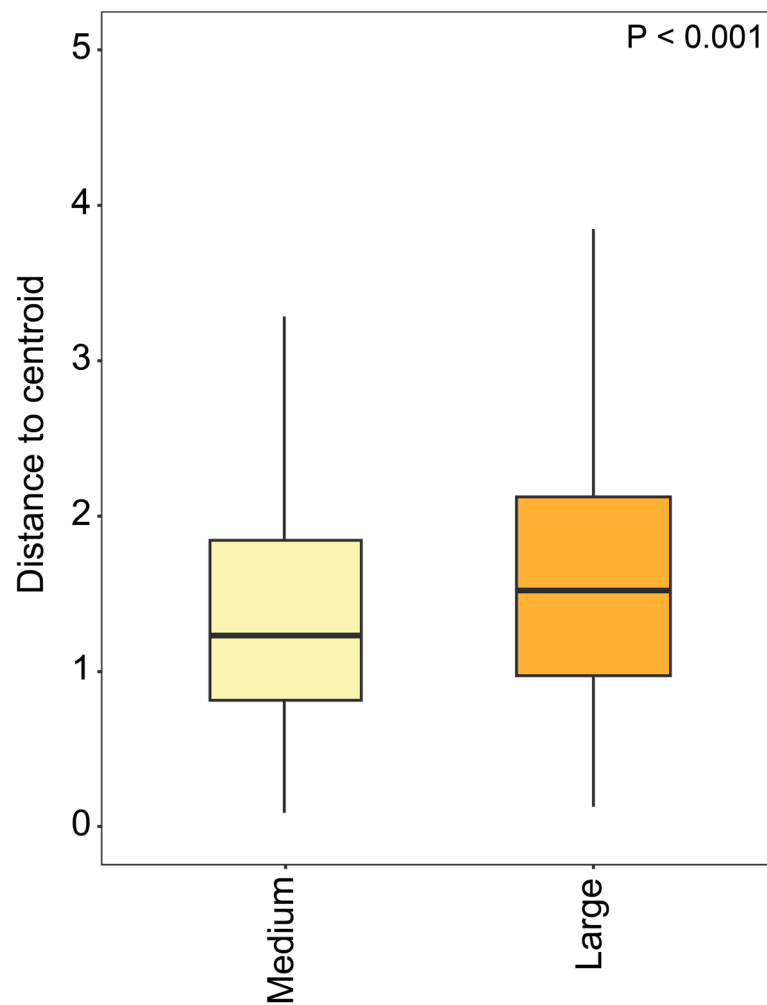

**Figure S1.** Distance to centroid for dNBR quartile values for medium-sized and large fires from 1991 to 2020, Utah, USA.

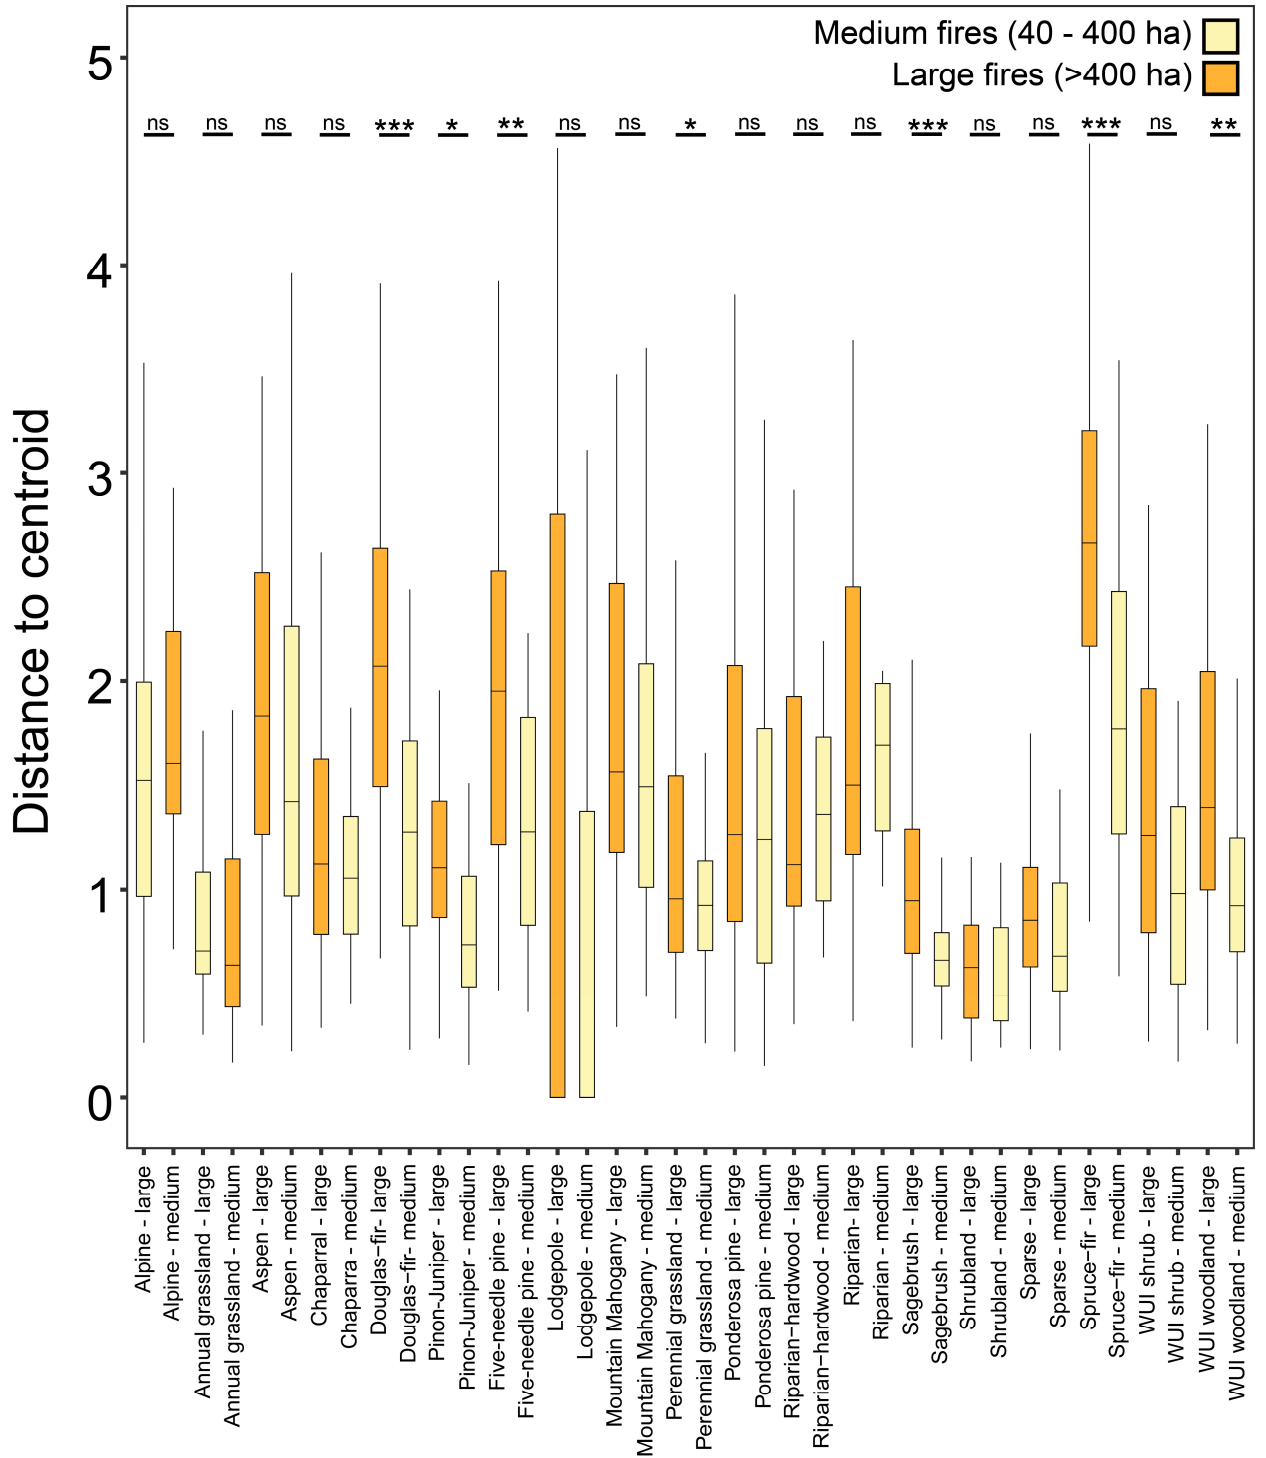

**Figure S2.** Distance to centroid for dNBR quartile values for medium-sized and large fires, by vegetation type, from 1991 to 2020, Utah, USA. Significant differences between medium and large fires are denoted as: \* =  $P < 0.05$ , \*\* =  $P < 0.01$ , \*\*\* =  $P < 0.001$ , and 'ns' =  $P > 0.05$
